# Supplementary material for: Incorporating Social Determinants of Health in Infectious Disease Models: A Systematic Review of Guidelines
Source: PubMed Central journal article supplement (PMC11491037; doi:10.1177/0272989x241280611), 2024-09-21
Supplement: sj-pdf-1-mdm-10.1177_0272989X241280611.pdf [file sj-pdf-1-mdm-10.1177_0272989X241280611.pdf]

# Appendix S1

## Search strategy to identify guidelines for infectious disease modeling

Database: Embase Classic+Embase <1947 to 2020 September 10>

Search Strategy:

- 
1. Theoretical Model/ (90145)
  2. Markov Chain/ or stochastic.ti,ab,kw. (44451)
  3. (forecast\* or model\* or simulat\*).ti,ab,kw. (4094081)
  4. Computer Simulation/ (119308)
  5. Monte Carlo method/ (40806)
  6. (Math\* adj3 model\*).ti,ab,kw. (71858)
  7. (markov chain\* or markov process\*).ti,ab,kw. (8361)
  8. "monte carlo method".ti,ab,kw. (3370)
  9. (computer simulation or computer\* model\*).ti,ab,kw. (26932)
  10. transmi\*.ti,ab,kw. (617226)
  11. Transmission dynamic\*.ti,ab,kw. (4212)
  12. ((transmission or outbreak\* or epidemi\* or compartmental or deterministic or individual-based or agent-based or network\* or prediction\* or infectious disease\* or markov or dynamic\* or simulation or patient specific) adj3 model\*).ti,ab,kw. (180626)
  13. ((data or contact or dynamic\* or social or sensor or transmission) adj3 network\*).ti,ab,kw. (49365)
  14. or/1-13 (4712650)
  15. (guideline\* or guidance).ti,ab,kw. or Practice Guideline/ (915281)
  16. Communicable Disease/ (30710)
  17. Disease Transmission/ (99705)
  18. or/16-17 (128464)
  19. 14 and 15 and 18 (2473)
  20. limit 19 to (embase and yr="2000 -Current") (1395)

## Appendix S2

### List of identified guidelines for infectious disease modeling

1. Abuelezam NN, Rough K, Seage III GR (2013) Individual-Based Simulation Models of HIV Transmission: Reporting Quality and Recommendations. PLoS ONE 8(9): e75624. doi:10.1371/journal.pone.0075624
2. Andradóttir, S., Chiu, W., Goldsman, D., & Lee, M. L. (2014). Simulation of influenza propagation: Model development, parameter estimation, and mitigation strategies. IIE Transactions on Healthcare Systems Engineering, 4(1), 27-48.
3. Barnes SL, Kasaie P, Anderson DJ, Rubin M. Research Methods in Healthcare Epidemiology and Antimicrobial Stewardship - Mathematical Modeling. Infection Control and Hospital Epidemiology. 2016;37(11):1265-71.
4. Behrend, M. R., Basáñez, M. G., Hamley, J. I., Porco, T. C., Stolk, W. A., Walker, M., ... & NTD Modelling Consortium. (2020). Modelling for policy: The five principles of the Neglected Tropical Diseases Modelling Consortium. PLoS neglected tropical diseases, 14(4), e0008033.
5. Caro JJ, Briggs AH, Siebert U, Kuntz KM. Modeling good research practices - Overview: A report of the ISPOR-SMDM modeling good research practices task force-1. Value in Health. 2012;15(6):796-803.
6. Caro J, Eddy DM, Kan H, Kaltz C, Patel B, Eldessouki R, Briggs AH; ISPOR-AMCP-NPC Modeling CER Task Forces. Questionnaire to assess relevance and credibility of modeling studies for informing health care decision making: an ISPOR-AMCP-NPC Good Practice Task Force report. Value Health. 2014 Mar;17(2):174-82. doi: 10.1016/j.jval.2014.01.003. Erratum in: Value Health. 2016 Jan;19(1):121.
7. Collaborating Group on Chagas Disease Modelling (CGCDM). Insights from quantitative and mathematical modelling on the proposed WHO 2030 goals for Chagas disease. Gates Open Research. 2019 Sep 17;3:1539. <https://gatesopenresearch.org/articles/3-1539>
8. COVID-19 Multi-Model Comparison Collaboration (CMCC) Policy Group. Guidance on Use of Modelling for Policy Responses to COVID-19. (conference proceeding); 2020
9. den Boon S, Jit M, Brisson M, Medley G, Beutels P, White R, et al. Guidelines for multi-model comparisons of the impact of infectious disease interventions. BMC medicine. 2019;17(1):163.
10. Drake T, Medley G, Vassall A, Gomez G. International Decision Support Initiative (IDSI). Equity, economic evaluation, and disease transmission modelling—26-27th March 2018: Pre-meeting reviews. F1000Research. 2019 Jun 20. DOI: <https://doi.org/10.7490/f1000research.1116870.1>

11. Funk, S., Bansal, S., Bauch, C. T., Eames, K. T., Edmunds, W. J., Galvani, A. P., & Klepac, P. (2015). Nine challenges in incorporating the dynamics of behaviour in infectious diseases models. *Epidemics*, 10, 21-25.
12. Jit, M., & Brisson, M. (2011). Modelling the epidemiology of infectious diseases for decision analysis. *Pharmacoeconomics*, 29(5), 371-386.
13. Knight, G. M., Dharan, N. J., Fox, G. J., Stennis, N., Zwerling, A., Khurana, R., & Dowdy, D. W. (2016). Bridging the gap between evidence and policy for infectious diseases: How models can aid public health decision-making. *International journal of infectious diseases*, 42, 17-23.
14. Moghadas SM, Haworth-Brockman M, Isfeld-Kiely H, Kettner J. Improving public health policy through infection transmission modelling: Guidelines for creating a community of practice. *Canadian Journal of Infectious Diseases and Medical Microbiology*. 2015;26(4):191-5.
15. Pitman R, Fisman D, Zaric GS, Postma M, Kretzschmar M, Edmunds J, et al. Dynamic transmission modeling: a report of the ISPOR-SMDM Modeling Good Research Practices Task Force--5. *Value in health : the journal of the International Society for Pharmacoeconomics and Outcomes Research*. 2012;15(6):828-34.
16. Roberts, M., Russell, L. B., Paltiel, A. D., Chambers, M., McEwan, P., & Krahn, M. (2012). Conceptualizing a model: a report of the ISPOR-SMDM modeling good research practices task force--2. *Medical Decision Making*, 32(5), 678-689.
17. Russell RE, Katz RA, Richgels KLD, Walsh DP, Grant EHC. A Framework for Modeling Emerging Diseases to Inform Management. *Emerging infectious diseases*. 2017;23(1):1-6.
18. Ultsch B, Damm O, Beutels P, Bilcke J, Bruggenjurgen B, Gerber-Grote A, et al. Methods for Health Economic Evaluation of Vaccines and Immunization Decision Frameworks: A Consensus Framework from a European Vaccine Economics Community. *Pharmacoeconomics*. 2016;34(3):227-44.
19. Woolhouse M. How to make predictions about future infectious disease risks. *Philosophical Transactions of the Royal Society B-Biological Sciences*. 2011;366(1573):2045-54.

**Appendix Table S1. Results of critical appraisal.**

| <b>Author, year</b> | <b>Domain 1</b> | <b>Domain 2</b> | <b>Domain 3</b> | <b>Domain 4</b> | <b>Domain 5</b> | <b>Domain 6</b> |
|---------------------|-----------------|-----------------|-----------------|-----------------|-----------------|-----------------|
| Abuelezam, 2013     | 100.0%          | 75.0%           | 70.8%           | 95.8%           | 88.9%           | 91.7%           |
| Andradottir, 2014   | 75.0%           | 62.5%           | 45.8%           | 54.2%           | 63.9%           | 83.3%           |
| Barnes, 2016        | 83.3%           | 58.3%           | 16.7%           | 91.7%           | 86.1%           | 95.8%           |
| Behrend, 2020       | 91.7%           | 91.7%           | 70.8%           | 91.7%           | 88.9%           | 91.7%           |
| Caro, 2012          | 100.0%          | 95.8%           | 87.5%           | 95.8%           | 91.7%           | 45.8%           |
| Caro, 2014          | 91.7%           | 95.8%           | 87.5%           | 91.7%           | 88.9%           | 87.5%           |
| CGCDM, 2019         | 66.7%           | 62.5%           | 37.5%           | 70.8%           | 75.0%           | 87.5%           |
| CMCC, 2020          | 83.3%           | 66.7%           | 45.8%           | 83.3%           | 80.6%           | 87.5%           |
| Den Boon, 2019      | 91.7%           | 91.7%           | 79.2%           | 91.7%           | 94.4%           | 91.7%           |
| Drake, 2018         | 83.3%           | 66.7%           | 37.5%           | 79.2%           | 58.3%           | 79.2%           |
| Funk, 2015          | 83.3%           | 54.2%           | 20.8%           | 83.3%           | 83.3%           | 75.0%           |
| Jit, 2011           | 91.7%           | 45.8%           | 70.8%           | 91.7%           | 83.3%           | 95.8%           |
| Knight, 2016        | 91.7%           | 70.8%           | 29.2%           | 91.7%           | 88.9%           | 91.7%           |
| Moghadas, 2015      | 83.3%           | 70.8%           | 37.5%           | 83.3%           | 75.0%           | 91.7%           |
| Pitman, 2012        | 83.3%           | 70.8%           | 79.2%           | 91.7%           | 91.7%           | 58.3%           |
| Roberts, 2012       | 91.7%           | 83.3%           | 87.5%           | 91.7%           | 86.1%           | 79.2%           |
| Russel, 2017        | 66.7%           | 66.7%           | 29.2%           | 87.5%           | 80.6%           | 70.8%           |
| Ultsch, 2016        | 83.3%           | 70.8%           | 83.3%           | 87.5%           | 86.1%           | 75.0%           |
| Woolhouse, 2011     | 83.3%           | 25.0%           | 54.2%           | 66.7%           | 77.8%           | 83.3%           |
